# Supplementary material for: Salivary microbiome and hypertension in the Qatari population
Source: Springer Nature journal article supplement (doi:10.1186/s12967-023-04247-8), 2023-07-08
Supplement: MOESM2 [file 25590972]

A)

### Tukey Simultaneous 95% CIs (Differences of Means for Cholesterol)

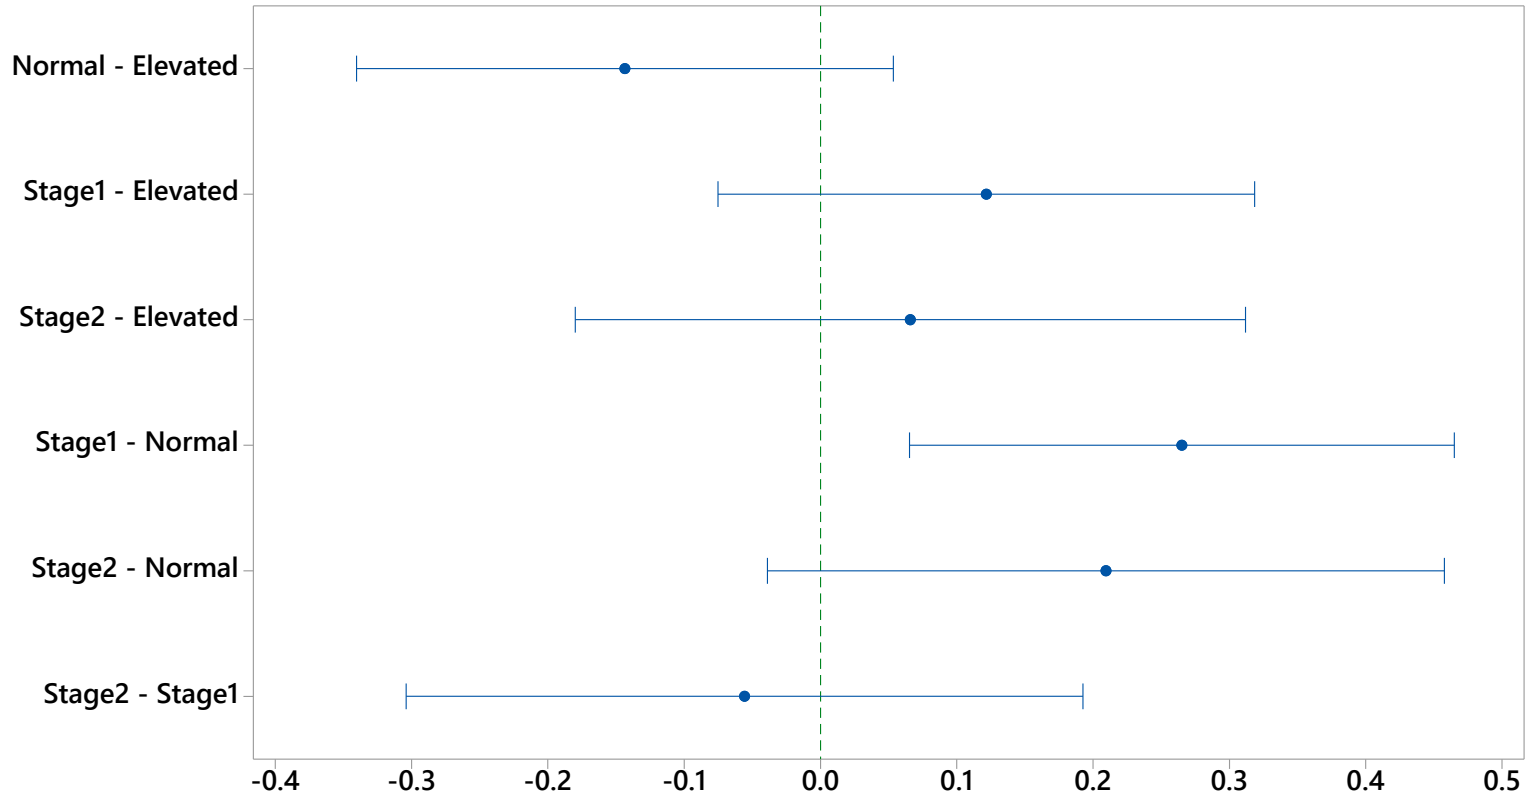

Means

| BP_group | N   | Mean   | StDev  | 95% CI           |
|----------|-----|--------|--------|------------------|
| Elevated | 357 | 5.1322 | 1.0438 | (5.0274, 5.2370) |
| Normal   | 336 | 4.9887 | 0.9495 | (4.8807, 5.0967) |
| Stage1   | 336 | 5.2539 | 0.9347 | (5.1459, 5.3619) |
| Stage2   | 161 | 5.1981 | 1.1867 | (5.0421, 5.3542) |

Pooled StDev = 1.00917

Tukey Pairwise Comparisons

Grouping Information Using the Tukey Method and 95% Confidence

| BP_group | N   | Mean   | Grouping |
|----------|-----|--------|----------|
| Stage1   | 336 | 5.2539 | A        |
| Stage2   | 161 | 5.1981 | A B      |
| Elevated | 357 | 5.1322 | A B      |
| Normal   | 336 | 4.9887 | B        |

Means that do not share a letter are significantly different.

## B) Tukey Simultaneous 95% CIs (Differences of Means for Insulin)

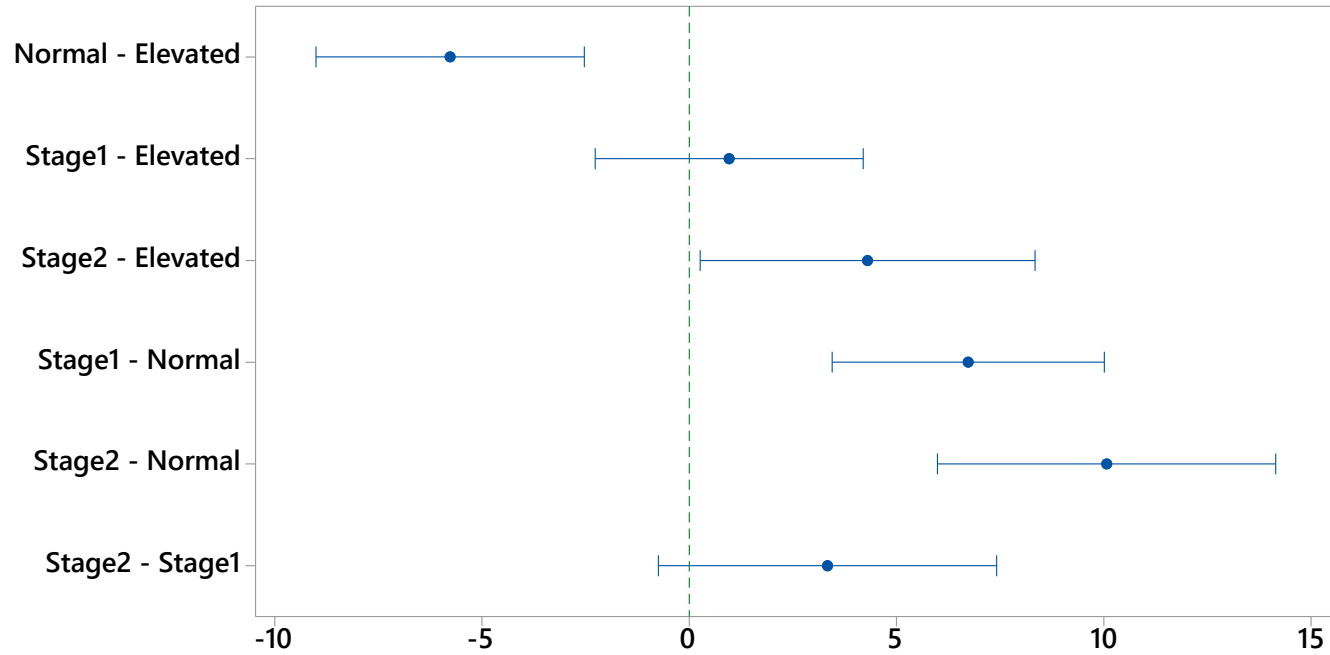

### Means

| BP_group | N   | Mean   | StDev  | 95% CI           |
|----------|-----|--------|--------|------------------|
| Elevated | 357 | 15.958 | 15.705 | (14.237, 17.680) |
| Normal   | 336 | 10.191 | 9.658  | (8.417, 11.966)  |
| Stage1   | 336 | 16.922 | 16.127 | (15.148, 18.696) |
| Stage2   | 161 | 20.26  | 27.35  | (17.70, 22.82)   |

Pooled StDev = 16.5762

### Tukey Pairwise Comparisons

Grouping Information Using the Tukey Method and 95% Confidence

| BP_group | N   | Mean   | Grouping |
|----------|-----|--------|----------|
| Stage2   | 161 | 20.26  | A        |
| Stage1   | 336 | 16.922 | A B      |
| Elevated | 357 | 15.958 | B        |
| Normal   | 336 | 10.191 | C        |

Means that do not share a letter are significantly different.
