# Supplementary material for: Salivary microbiome and hypertension in the Qatari population
Source: Springer Nature journal article supplement (doi:10.1186/s12967-023-04247-8), 2023-07-08

Receiver Operating Characteristic Average Scores

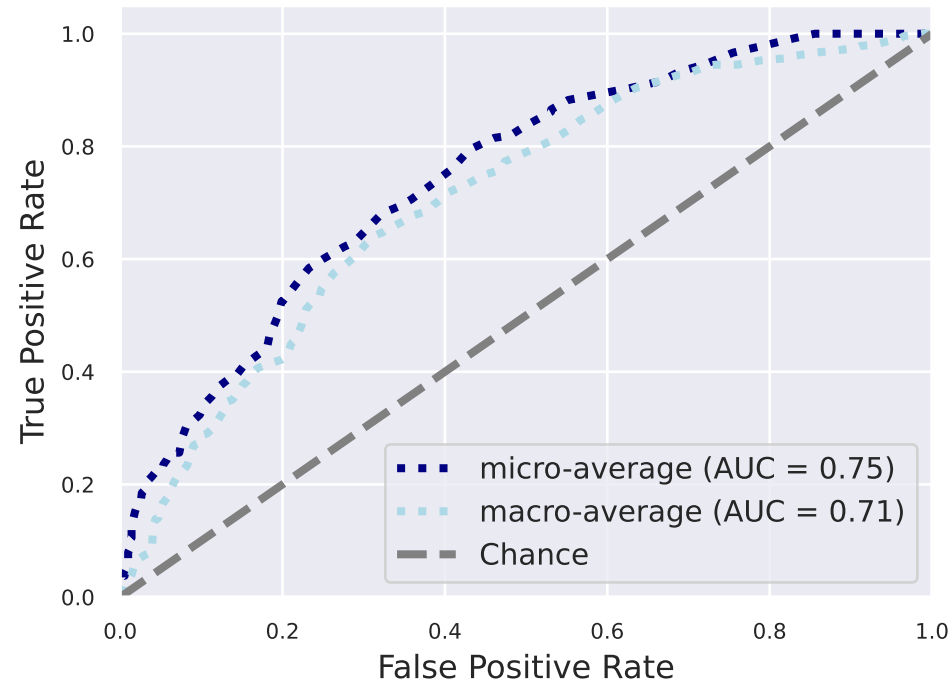

Per-Class Receiver Operating Characteristics

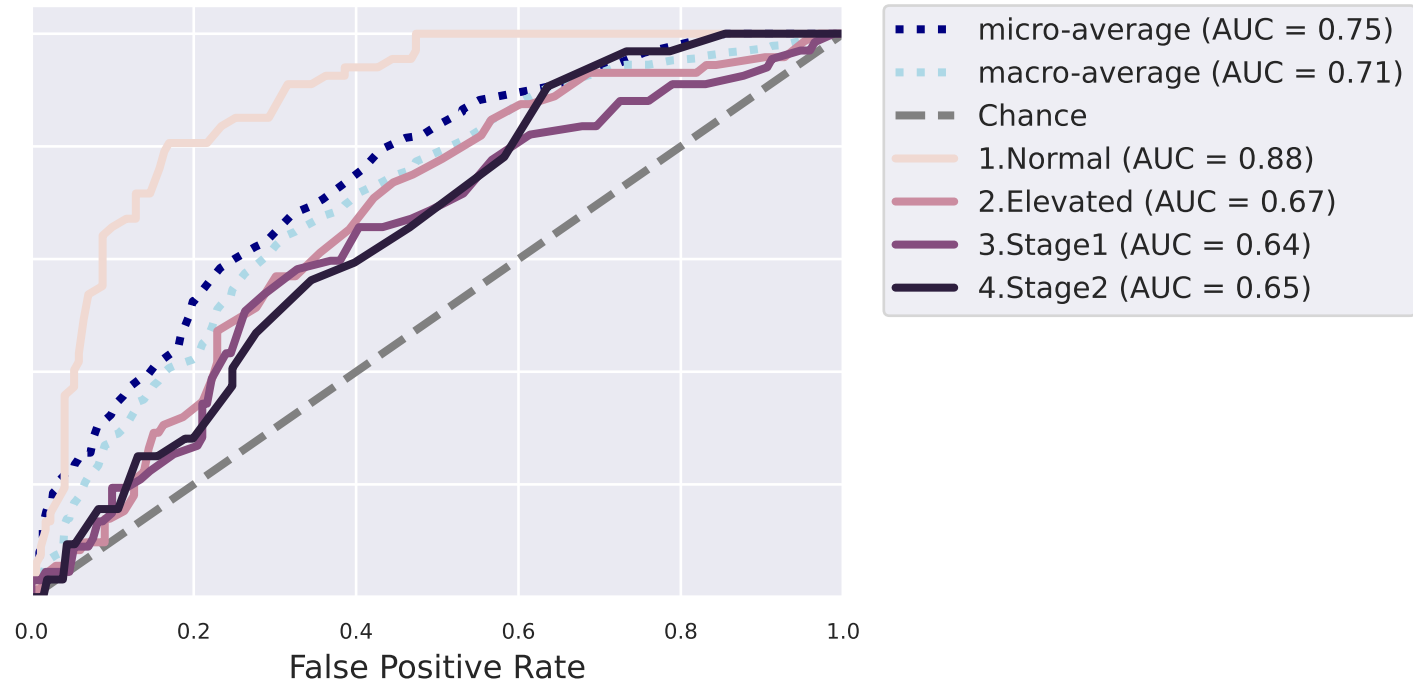

Supplement: MOESM3 [file 25590972]
